# Supplementary material for: A subcomplex of human mitochondrial RNase P is a bifunctional methyltransferase—extensive moonlighting in mitochondrial tRNA biogenesis
Source: PubMed Central journal article supplement (PMC3526285; doi:10.1093/nar/gks910), 2012-10-05
Supplement: supp_gks910_nar-02050-r-2012-File010.pdf [file supp_gks910_nar-02050-r-2012-File010.pdf]

## **SUPPLEMENTARY DATA**

### **A subcomplex of human mitochondrial RNase P is a bifunctional methyltransferase – extensive moonlighting in mitochondrial tRNA biogenesis**

**Elisa Vilaro, Christa Nachbagauer, Aurélie Buzet, Andreas Taschner, Johann Holzmann, Walter Rossmannith\***

Center for Anatomy & Cell Biology, Medical University of Vienna, 1090 Vienna, Austria

\*To whom correspondence should be addressed. Tel: +43 1 40160 37512; Fax: +43 1 40160 937500;  
Email: [walter.rossmanith@meduniwien.ac.at](mailto:walter.rossmanith@meduniwien.ac.at)

## SUPPLEMENTARY TABLE AND FIGURES

**Supplementary Table S1** Nomenclature and synonyms of the studied proteins

|                      | species              | UniProtKB <sup>a</sup> | gene <sup>b</sup> | gene ID <sup>c</sup> | synonyms <sup>d</sup>           |
|----------------------|----------------------|------------------------|-------------------|----------------------|---------------------------------|
| TRMT10C <sup>e</sup> | <i>H. sapiens</i>    | Q7L0Y3                 | <i>TRMT10C</i>    | 54931                | MRPP1, RG9MTD1                  |
| SDR5C1 <sup>f</sup>  | <i>H. sapiens</i>    | Q99714                 | <i>HSD17B10</i>   | 3028                 | MRPP2, HADH2, ABAD, HSD10, HCD2 |
| PRORP <sup>g</sup>   | <i>H. sapiens</i>    | O15091                 | <i>KIAA0391</i>   | 9692                 | MRPP3                           |
| Trm10p               | <i>S. cerevisiae</i> | Q12400                 | <i>TRM10</i>      | 854060               | YOL093W                         |
| TRMT10A <sup>e</sup> | <i>H. sapiens</i>    | Q8TBZ6                 | <i>TRMT10A</i>    | 93587                | RG9MTD2                         |
| TRMT10B <sup>e</sup> | <i>H. sapiens</i>    | Q6PF06                 | <i>TRMT10B</i>    | 158234               | RG9MTD3                         |

The proteins studied in this work are listed together with their identifiers, gene symbol, and common synonyms.

<sup>a</sup>UniProtKB identifier.

<sup>b</sup>Gene symbol according to the HUGO Gene Nomenclature Committee and the *Saccharomyces* Genome Database, respectively.

<sup>c</sup>NCBI Entrez gene identifier.

<sup>d</sup>Only the more commonly used synonyms are listed. In the case of yeast TRM10 the locus tag is listed.

<sup>e</sup>Newly approved nomenclature reflecting the methyltransferase function of three human TRM10 homologs and conforming to the nomenclature of other human tRNA methyltransferases.

<sup>f</sup>According to the recently proposed systematic nomenclature of the SDR superfamily (46).

<sup>g</sup>Recently proposed, common symbol/name (proteinaceous RNase P) for the gene family (18,43).

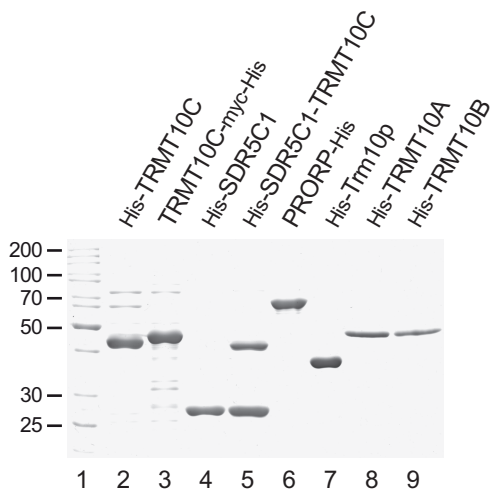

**Supplementary Figure S1** Recombinant proteins used in this study. ~5  $\mu$ g of the purified recombinant proteins (2.5  $\mu$ g of TRMT10A and TRMT10B) were resolved by SDS-PAGE and stained with Coomassie brilliant blue. N-terminal tags precede the protein name and C-terminal tags follow the name. The molecular weight of selected marker proteins (lane 1) is indicated to the left.

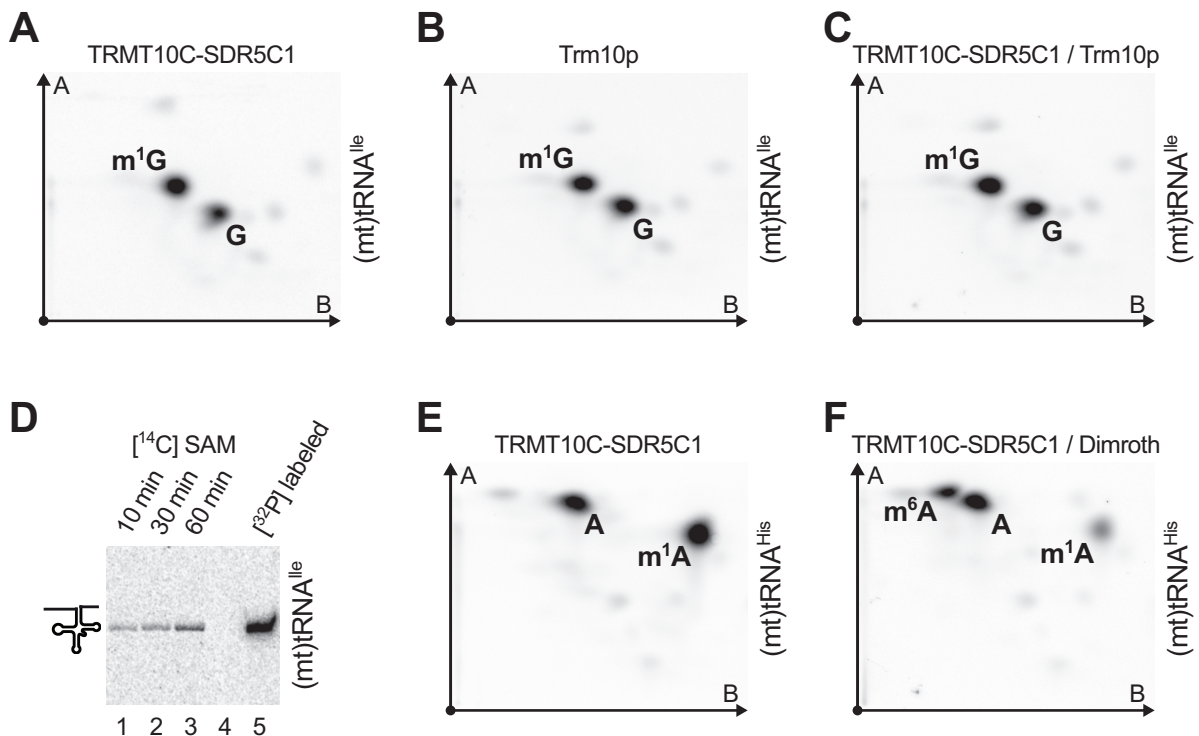

**Supplementary Figure S2** Characterization of the methylation products of the human TRMT10C-SDR5C1 methyltransferase complex. **(A–C)** The G9 methylation product is 1-methylguanosine ( $m^1G$ ). **(A)** Position 9-labeled  $(mt)tRNA^{Ile}$  was methylated with recombinant TRMT10C-SDR5C1 and the RNA hydrolysate resolved by two-dimensional TLC. Origin and direction of migration in solvent A and B are indicated. Guanosine monophosphate (G) and its methylated derivative ( $m^1G$ ) were identified by comparison to reference maps (24). **(B)**  $(Mt)tRNA^{Ile}$  was methylated with recombinant yeast Trm10p and the RNA hydrolysate resolved by two-dimensional TLC. **(C)** RNA hydrolysates from **(A)** and **(B)** were mixed and resolved by two-dimensional TLC. **(D)** The methyl group is derived from *S*-adenosyl methionine (SAM). Unlabeled, *in vitro* transcribed  $(mt)pre-tRNA^{Ile}$  (250 nM) was incubated with 50 nM recombinant TRMT10C-SDR5C1 and 10  $\mu$ M *S*-adenosyl [methyl- $^{14}C$ ]-methionine ( $[^{14}C]$  SAM). Samples were removed at the indicated time points and resolved by denaturing PAGE (lanes 1–3). A  $^{32}P$ -labeled  $(mt)pre-tRNA^{Ile}$  was loaded as a size marker (lane 5). **(E and F)** The A9 methylation product is 1-methyladenosine ( $m^1A$ ). **(E)** Position 9-labeled  $(mt)tRNA^{His}$  was methylated with recombinant TRMT10C-SDR5C1 and the RNA hydrolysate resolved by two-dimensional TLC. Origin and direction of migration in solvent A and B are indicated. Adenosine monophosphate (A) and its methylated derivative ( $m^1A$ ) were identified by comparison to reference maps (24). **(F)** A sample of the RNA hydrolysate from **(E)** was treated with ammonia to induce the isomerization of  $m^1A$  to  $m^6A$  (Dimroth rearrangement; ref. 27) and subsequently resolved by two-dimensional TLC. Adenosine monophosphate (A), its methylated derivative ( $m^1A$ ) and the latter's isomer  $m^6A$  were identified by comparison to reference maps (24).

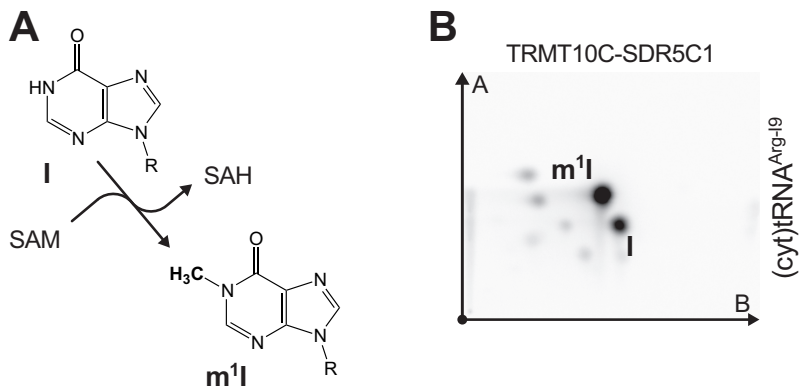

**Supplementary Figure S3** Inosine methylation by the human TRMT10C-SDR5C1 methyltransferase complex. **(A)** Enzymatic methylation of the  $N^1$  of inosine using *S*-adenosyl methionine (SAM) as the methyl group donor and release of *S*-adenosyl homocysteine (SAH). **(B)** The I9 methylation product is 1-methylinosine ( $m^1I$ ). Position 9-labeled (cyt)tRNA<sup>Arg-19</sup> (G9 replaced by inosine) was methylated with recombinant TRMT10C-SDR5C1 and the RNA hydrolysate resolved by two-dimensional TLC. Origin and direction of migration in solvent A and B are indicated. Inosine monophosphate (I) and its methylated derivative ( $m^1I$ ) were identified by comparison to reference maps (24).

## SUPPLEMENTARY REFERENCES

18. Rossmannith, W. (2012) Of P and Z: Mitochondrial tRNA processing enzymes. *Biochim. Biophys. Acta*, **1819**, 1017-1026.
24. Grosjean, H., Droogmans, L., Roovers, M. and Keith, G. (2007) Detection of enzymatic activity of transfer RNA modification enzymes using radiolabeled tRNA substrates. *Methods Enzymol.*, **425**, 55-101.
27. Jones, J.W. and Robins, R.K. (1963) Purine nucleosides. III. Methylation studies of certain naturally occurring purine nucleosides. *J. Am. Chem. Soc.*, **85**, 193-201.
43. Gobert, A., Gutmann, B., Taschner, A., Gößringer, M., Holzmann, J., Hartmann, R.K., Rossmannith, W. and Giegé, P. (2010) A single *Arabidopsis* organellar protein has RNase P activity. *Nat. Struct. Mol. Biol.*, **17**, 740-744.
46. Persson, B., Kallberg, Y., Bray, J.E., Bruford, E., Dellaporta, S.L., Favia, A.D., Duarte, R.G., Jörnvall, H., Kavanagh, K.L., Kedishvili, N. *et al.* (2009) The SDR (short-chain dehydrogenase/reductase and related enzymes) nomenclature initiative. *Chem. Biol. Interact.*, **178**, 94-98.
